# Supplementary material for: Assessing Osteolytic Lesion Size on Sequential CT Scans Is a Reliable Study Endpoint for Bone Remineralization in Newly Diagnosed Multiple Myeloma
Source: MDPI journal article supplement (doi:10.3390/cancers15154008), 2023-08-07
Supplement: s1 [file s1]

Supplemental Table S1 – E-KRd induction therapy protocol

| Therapy                                     | Dosage                          | Induction                           |
|---------------------------------------------|---------------------------------|-------------------------------------|
| <b>Elotuzumab</b> (intravenous infusion)    | 10 mg/kg                        | Day 1, 8, 15, 22 of cycle 1 and 2,  |
|                                             | 10 mg/kg                        | Day 1 and 15 of cycles 3-6.         |
| <b>Carfilzomib</b> (intravenous infusion)   | 20 mg/m <sup>2</sup>            | Day 1 and 2 of cycle 1              |
|                                             | 36 mg/m <sup>2</sup>            | Day 8, 9, 15, 16 of cycle 1         |
|                                             | 36 mg/m <sup>2</sup>            | Day 1, 2, 8, 9, 15, 16 of cycle 2-6 |
| <b>Lenalidomide</b> (oral hard capsule)     | 25 mg                           | Day 1-21 of cycle 1-6               |
| <b>Dexamethasone</b> (oral and intravenous) | 28 mg oral and 8 mg intravenous | Day 1, 8, 15, 22 of cycles 1-2      |
|                                             | 28 mg oral and 8 mg intravenous | Day 1 and 15 of cycles 3-6          |
|                                             | 40 mg oral                      | Day 8 and 22 of cycle 3-6           |
