# Supplementary material for: Assessing Osteolytic Lesion Size on Sequential CT Scans Is a Reliable Study Endpoint for Bone Remineralization in Newly Diagnosed Multiple Myeloma
Source: MDPI journal article supplement (doi:10.3390/cancers15154008), 2023-08-07
Supplement: s1 [file s1]

Supplemental Table S2 – Reader concordance on bone destruction

Concordance for the presence of cortical destruction in lesions suspected by at least one of the readers was 80% (45/[45+7+4]). For pathologic fractures, reader concordance was 87% (13/[13+2+0]).

| <b>Cortical destruction</b> |         | <b>Reader 2</b> |          |            |
|-----------------------------|---------|-----------------|----------|------------|
|                             |         | Absent          | Present  | Sum        |
| <b>Reader 1</b>             | Absent  | 132 (70%)       | 4 (2%)   | 136 (72%)  |
|                             | Present | 7 (4%)          | 45 (24%) | 52 (28%)   |
|                             | Sum     | 139 (74%)       | 49 (26%) | 188 (100%) |
| <b>Pathologic fracture</b>  |         | <b>Reader 2</b> |          |            |
|                             |         | Absent          | Present  | Sum        |
| <b>Reader 1</b>             | Absent  | 173 (92%)       | 0 (0%)   | 173 (92%)  |
|                             | Present | 2 (1%)          | 13 (7%)  | 15 (8%)    |
|                             | Sum     | 175 (93%)       | 13 (7%)  | 188 (100%) |

***Note.** – Concordance was calculated for all 188 lesions described by both readers at baseline and follow-up imaging.*
