# Supplementary material for: Assessing Osteolytic Lesion Size on Sequential CT Scans Is a Reliable Study Endpoint for Bone Remineralization in Newly Diagnosed Multiple Myeloma
Source: MDPI journal article supplement (doi:10.3390/cancers15154008), 2023-08-07
Supplement: s1 [file s1]

Supplemental Table S3 – Reader concordance on bone remineralization

Concordance for the presence of rim sclerosis in lesions suspected by at least one of the readers was 72% (60/[60+21+2]). For trabecular sclerosis, reader concordance was 73% (29/[29+3+8]).

| <b>Rim sclerosis</b>        |         | <b>Reader 2</b> |          |            |
|-----------------------------|---------|-----------------|----------|------------|
|                             |         | Absent          | Present  | Sum        |
| <b>Reader 1</b>             | Absent  | 105 (56%)       | 2 (1%)   | 107 (57%)  |
|                             | Present | 21 (11%)        | 60 (32%) | 81 (43%)   |
|                             | Sum     | 126 (67%)       | 62 (33%) | 188 (100%) |
| <b>Trabecular sclerosis</b> |         | <b>Reader 2</b> |          |            |
|                             |         | Absent          | Present  | Sum        |
| <b>Reader 1</b>             | Absent  | 148 (79%)       | 8 (4%)   | 156 (83%)  |
|                             | Present | 3 (2%)          | 29 (15%) | 32 (17%)   |
|                             | Sum     | 151 (80%)       | 37 (20%) | 188 (100%) |

**Note.** – Concordance was calculated for all 188 lesions described by both readers at baseline and follow-up imaging.
