# Supplementary material for: Assessing Osteolytic Lesion Size on Sequential CT Scans Is a Reliable Study Endpoint for Bone Remineralization in Newly Diagnosed Multiple Myeloma
Source: Cancers (Basel). 2023 Aug 7;15(15):4008. doi: 10.3390/cancers15154008 (PMC10417114; doi:10.3390/cancers15154008)
Supplement: Supplementary file 1 [file cancers-15-04008-s001.zip]

Archive with 4 entries (4 files):
- Supplemental Figures S1-S3.pdf
- Supplemental Table S1.pdf
- Supplemental Table S2.pdf
- Supplemental Table S3.pdf
